# Supplementary material for: The yeast mitochondrial pyruvate carrier is a hetero‐dimer in its functional state
Source: PubMed Central journal article supplement (PMC6517818; doi:10.15252/embj.2018100785), 2019-04-12
Supplement: EMBJ-38-e100785-s001.pdf [file EMBJ-38-e100785-s001.pdf]

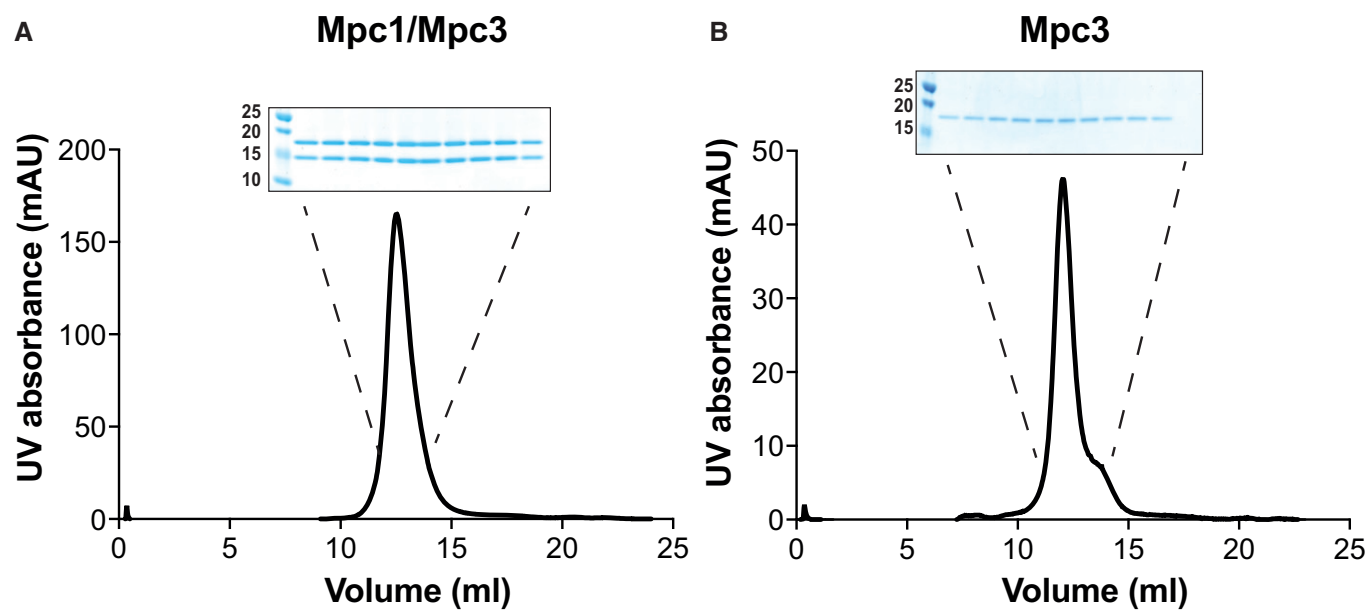

**Figure EV3. Size-exclusion chromatography.**

A Size-exclusion chromatography of 500  $\mu$ g nickel-affinity-purified Mpc1/Mpc3 hetero-complex. In the  $A_{280}$  profiles, the Mpc1/Mpc3 hetero-complex was present in a symmetrical peak.

B Size-exclusion chromatography of 150  $\mu$ g nickel-affinity-purified Mpc3. Mpc3 produced a peak similar to that of Mpc1/Mpc3.

Data information: Insets in (A and B) show peak fractions collected and analysed by SDS-PAGE and visualised by Coomassie Blue stain.

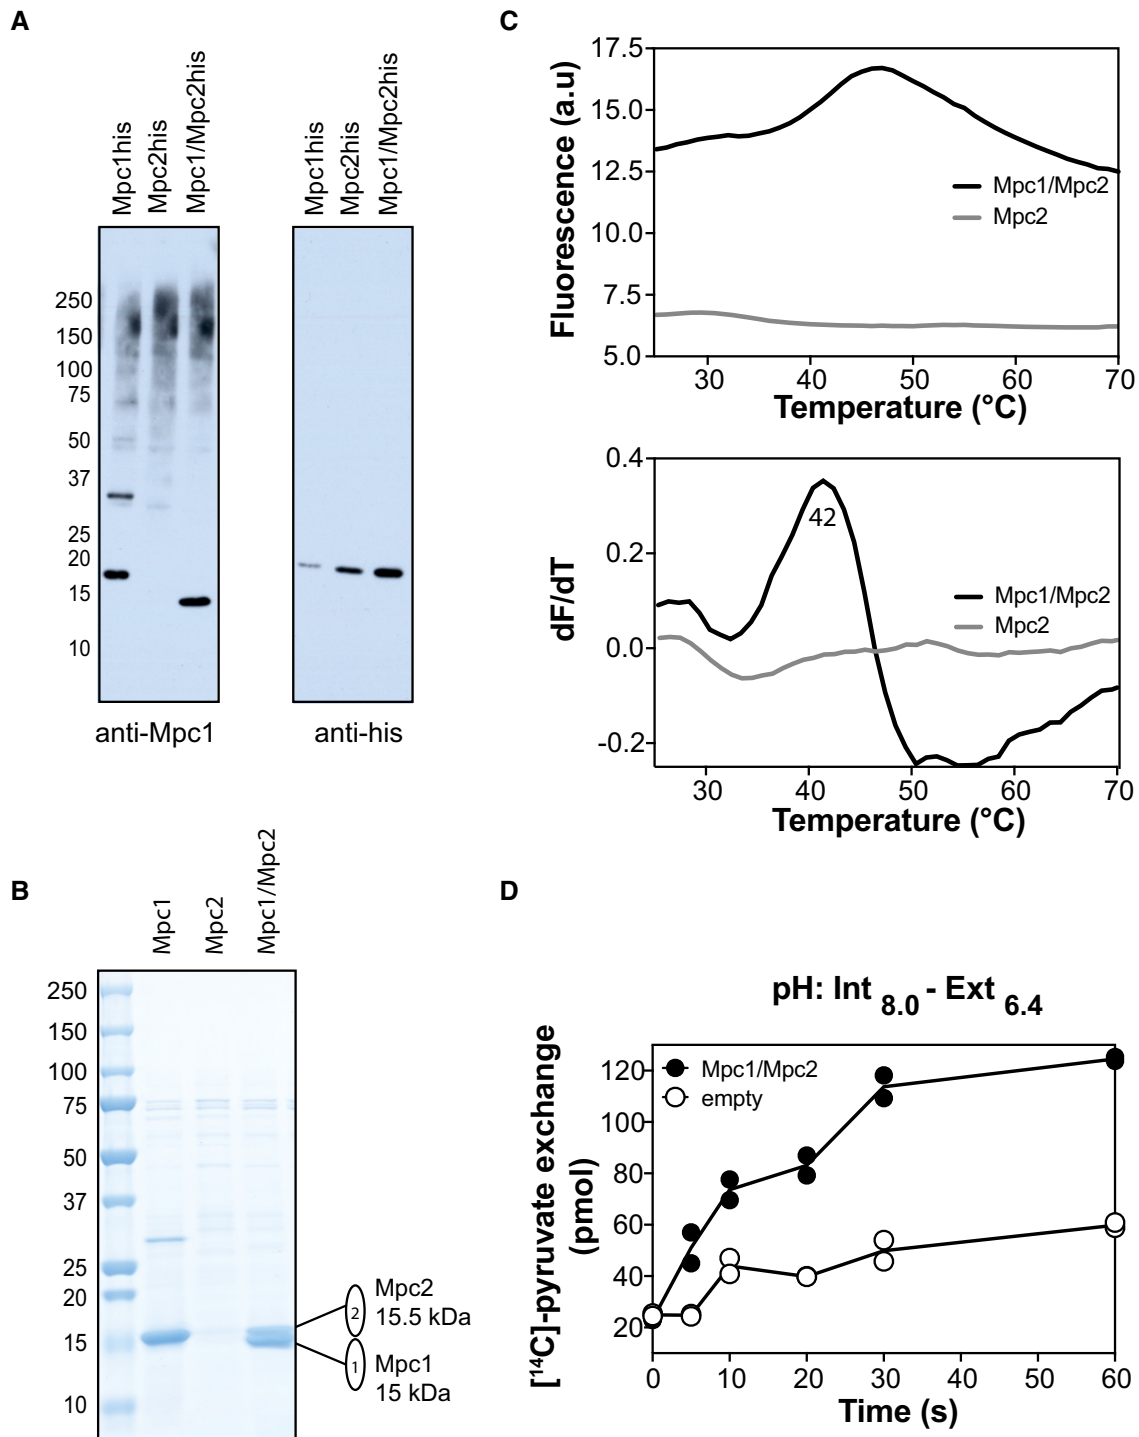

**Figure EV4. Purification and stability analysis of the hetero-complex Mpc1/Mpc2.**

A The individual histidine-tagged Mpc1 (Mpc1his), histidine-tagged Mpc2 (Mpc2his) or the Mpc1/Mpc2 hetero-complex (Mpc1/Mpc2his) was expressed in the triple *mcp* knock-out strain SHY15 and detected with antibodies raised against Mpc1 (left) or against the histidine tag (right).

B SDS-PAGE analysis of purified Mpc1, Mpc2 and Mpc1/Mpc2 proteins, visualised with Coomassie Blue stain. As the yield of the purified Mpc2 was very low, the protein was not visible with Coomassie Blue stain, but was identified on the gel by peptide mass finger printing (Table EV1).

C The stability of the purified Mpc1/Mpc2 or Mpc2 was assessed via the CPM method. Thermal denaturation profiles (upper panel) were used to calculate the first derivative of the data (lower panel). The number is the apparent melting temperature for the Mpc1/Mpc2 hetero-complex.

D Time course of pyruvate homo-exchange by the Mpc1/Mpc2 hetero-complex in liposomes in comparison with empty liposomes at a  $\Delta\text{pH}$  of 1.6 ( $n = 2$ ).

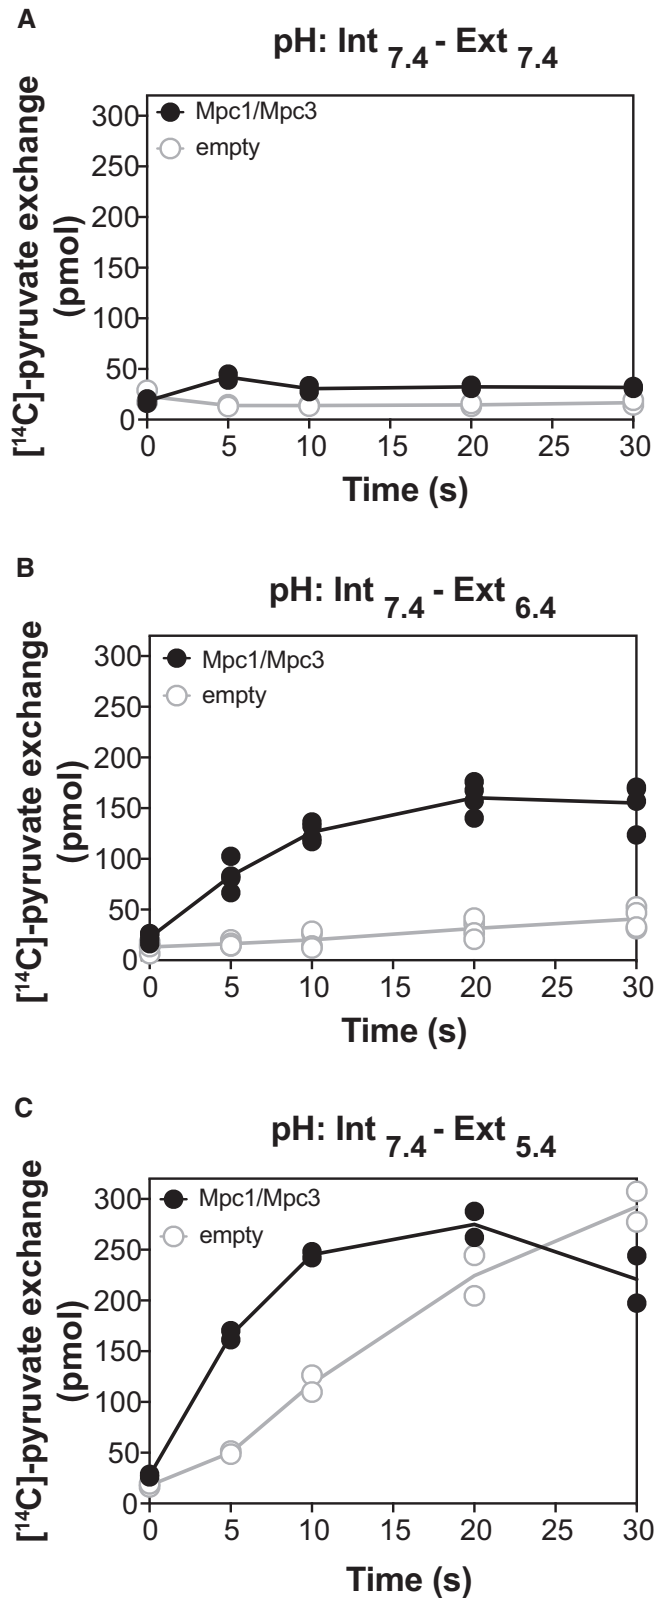

**Figure EV5.** Effect of pH on pyruvate homo-exchange in Mpc1/Mpc3-containing proteoliposomes compared to diffusion of pyruvate into empty liposomes.

Pyruvate homo-exchange of Mpc1/Mpc3 proteoliposomes or empty liposomes was tested in three conditions.

- A In the absence of a  $\Delta\text{pH}$ , using an internal buffer pH of 7.4 and external buffer pH of 7.4 ( $n = 2$ ).
- B At a  $\Delta\text{pH}$  of 1.0, using an internal buffer pH of 7.4 and external buffer pH of 6.4 ( $n = 4$ ).
- C At a  $\Delta\text{pH}$  of 2.0, using an internal buffer pH of 7.4 and external buffer pH of 5.4 ( $n = 2$ ).
